# Supplementary material
Source: Springer Nature journal article supplement (https://www.springermedizin.de/resource/supplementary/12887_2013_974_MOESM1_ESM.pdf/9476822)
Supplement: MOESM1 [file 9476822]

## CONTENT VALIDITY

### Literature review

(Scopus database)

#### 4 pediatric questionnaires

- 4 about asthma control:
  - The Asthma Quiz for Kidz
  - Childhood Asthma Control Test
  - Asthma Therapy Assessment Questionnaire (ATAQ) - Children
  - Test for Respiratory and Asthma Control in Kids (TRACK)
- none about rhinitis control
- none about ARA control

CARAT17  
(CARAT10)

### 1<sup>st</sup> consensus meeting

(January 2010)

#### 26 portuguese experts in ARA

Allergologists  
General Practitioners  
Pediatricians  
Pulmonologists

Group 1

Group 2

Group 3

Independent proposal of a pool of questions  
appropriate to evaluate control of ARA in children

Development of the first draft of the questionnaire  
based on **CARAT17**

### 2<sup>nd</sup> consensus meeting

(January 2011)

Presentation to the expert panel

Discussion of the first draft of the questionnaire

Changes to the first draft of the questionnaire

Approval of the **testversion** of the CARATkids  
questionnaire (2 versions: children and caregivers)

Cognitive testing
